# Supplementary material for: Performance Evaluation of the KRYPTOR Compact PLUS Analyzer-Based B.R.A.H.M.S. CgA Ⅱ KRYPTOR Assay for Chromogranin A Measurement
Source: MDPI journal article supplement (doi:10.3390/diagnostics11122400), 2021-12-20
Supplement: s1 [file s1]

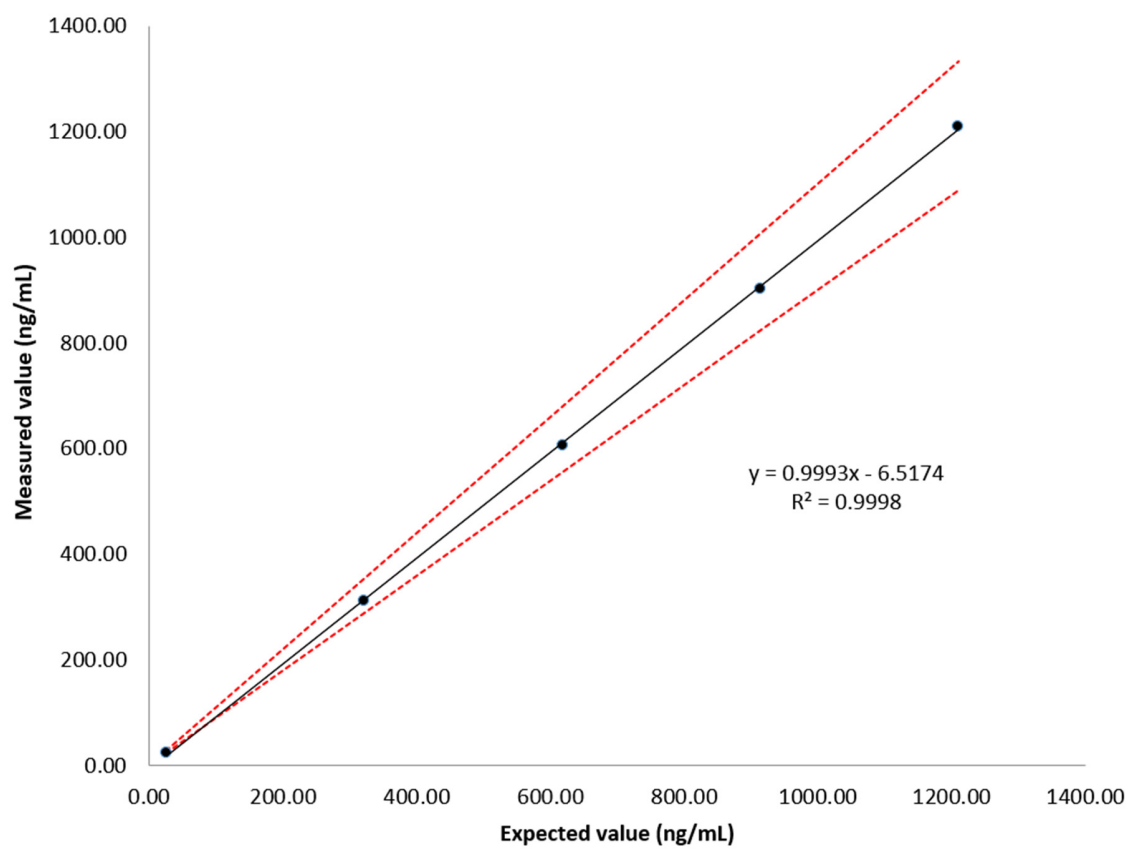

**Figure S1.** Linearity of KRYPTOR. An error rate of  $\pm 10\%$  is shown by the two dotted lines.

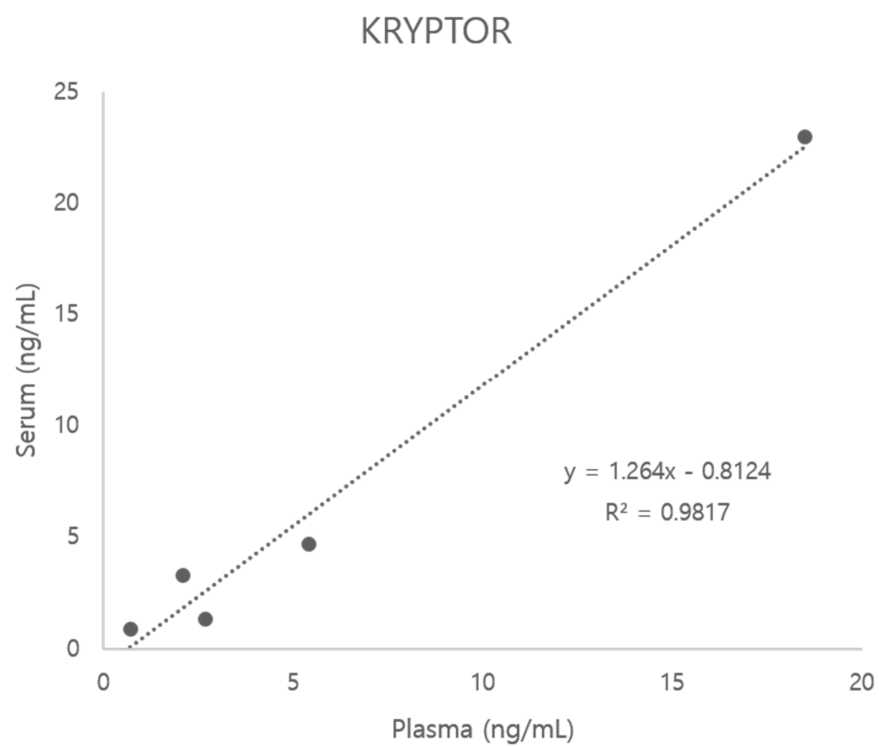

**Figure S2.** Linear regression of average values of CgA levels measured using both plasma and serum samples from five patients having different concentrations of CgA.
